# Supplementary material for: 68-channel neural signal processing system-on-chip with integrated feature extraction, compression, and hardware accelerators for neuroprosthetics in 22 nm FDSOI
Source: PubMed Central journal article supplement (PMC11541109; doi:10.3389/fnins.2024.1432750), 2024-10-23
Supplement: Data_Sheet_1.pdf [file Data_Sheet_1.pdf]

## ***Supplementary Material***

### **LIST OF ABBREVIATIONS**

|       |                                              |
|-------|----------------------------------------------|
| ABB   | Adaptive Body-Biasing                        |
| AC    | Arithmetic Coding                            |
| ADC   | Analog-to-Digital Converter                  |
| ADW   | Analog-Digital Wrapper                       |
| AF    | Adaptive Filter                              |
| AFE   | Analog Frontend                              |
| AHB   | Advanced High-Performance Bus                |
| AP    | Action Potential                             |
| APB   | Advanced Peripheral Bus                      |
| CBPU  | Central Bio-Signal Processing Unit           |
| CCE   | Cross-Channel Compression Engine             |
| CE    | Compression Engine                           |
| DB    | Data Buffer                                  |
| DF    | Digital Filter                               |
| DPCM  | Differential Pulse-Code Modulation           |
| DPCM2 | 2nd-order Differential Pulse-Code Modulation |
| DSA   | Delta-Sigma Analog-to-Digital Converter      |
| DSPW  | Digital Signal Processing Wrapper            |
| ENOB  | Effective Number of Bits                     |
| FDSOI | Fully Depleted Silicon-On-Insulator          |
| FE    | Feature Extraction                           |
| FFT   | Fast Fourier Transform                       |
| FIR   | Finite Impulse Response                      |
| FIFO  | First-In-First-Out                           |
| GC    | Golomb Coding                                |
| GPIO  | General Purpose Input/Output                 |
| HPF   | High-Pass Filter                             |
| ICE   | Intra-Channel Compression Engine             |
| IRQ   | Interrupt Request                            |
| KiB   | Kibibyte                                     |
| LFP   | Local Field Potential                        |
| LL    | Lossless                                     |
| LPF   | Low-Pass Filter                              |
| MAC   | Multiply-Accumulate                          |
| MBIST | Memory Built-In Self Test                    |
| Mbps  | Megabits per Second                          |
| MCDE  | Multi-Channel Decorrelation Engine           |
| MCU   | Microcontroller Unit                         |
| MUA   | Multi-Unit Activity                          |
| MUX   | Multiplexer                                  |

|        |                                  |
|--------|----------------------------------|
| NE     | Noise Estimator                  |
| NEO    | Nonlinear Energy Operator        |
| NLL    | Near-lossless                    |
| PCA    | Principal Component Analysis     |
| PCB    | Printed Circuit Board            |
| PMU    | Power Management Unit            |
| PVT    | Process Voltage and Temperature  |
| RF     | Register File                    |
| RISC-V | Reduced Instruction Set Computer |
| RLE    | Run-Length Encoding              |
| SD     | Spike Detector                   |
| SoC    | System-on-Chip                   |
| SPI    | Serial Peripheral Interface      |
| SR     | Spike Raster                     |
| SRAM   | Static Random Access Memory      |
| SS     | Spike Sorting                    |
| SSR    | Space Saving Ratio               |
| VDD    | Supply Voltage                   |
| ZC     | Zero Crossing                    |
